# Supplementary material for: Treatment of Opioid Withdrawal Syndrome Triggered by Oxycodone/Naloxone with Dexmedetomidine
Source: PubMed Central journal article supplement — J Hosp Palliat Care. 2023 Mar 1;26(1):18–21. doi: 10.14475/jhpc.2023.26.1.18 (PMC10519718; doi:10.14475/jhpc.2023.26.1.18), 2023-03-01
Supplement: jhpc-26-1-18-supple.pdf [file jhpc-26-1-18-supple.pdf]

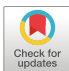

# Dexmedetomidine을 통해 옥시코돈/날록손 복합제에 의해 유발된 아편유사제 금단 증후군을 치료한 증례보고

고세일, 김정훈\*, 강정훈\*

경상국립대학교 의과대학 창원경상국립대학교병원 내과, \*경상국립대학교 의과대학 내과학교실

## Treatment of Opioid Withdrawal Syndrome Triggered by Oxycodone/Naloxone with Dexmedetomidine

Se-Il Go, M.D., Jung Hoon Kim, M.D., Ph.D.\* and Jung Hun Kang, M.D., Ph.D.\*

Department of Internal Medicine, Gyeongsang National University Changwon Hospital,  
Gyeongsang National University College of Medicine, Changwon,

\*Department of Internal Medicine, Gyeongsang National University College of Medicine, Jinju, Korea

The combination of oxycodone and naloxone is useful for cancer pain management. Naloxone, as a pure opioid antagonist, cannot be used simultaneously with opioids. However, owing to its low bioavailability, it can be used in an oral composite formulation. We present the case of a 55-year-old man with gastric cancer who experienced severe opioid withdrawal syndrome (OWS) triggered by oxycodone/naloxone that was successfully managed with dexmedetomidine. He had been in a stable condition on intravenous morphine to alleviate cancer pain. Intravenous morphine was switched to oral oxycodone/naloxone for discharge from the hospital. The patient suddenly developed restlessness, heartburn, and violent behavior 30 minutes after taking oxycodone/naloxone. We attempted sedation with midazolam and propofol, but paradoxical agitation and desaturation occurred. Next, we tried dexmedetomidine and the patient showed a decreased heart rate and reduced agitation. The patient was eventually stabilized by increasing the dose of dexmedetomidine. This report informs clinicians of the possibility of OWS when switching from opioids to oxycodone/naloxone, which can be overcome with the appropriate use of sedatives and dexmedetomidine depending on the patient's condition.

Received January 1, 2023  
Revised February 7, 2023  
Accepted February 7, 2023

Correspondence to  
Jung Hun Kang  
ORCID:  
<https://orcid.org/0000-0001-5013-2683>  
E-mail: newatp1981@gmail.com

**Key Words:** Drug withdrawal symptoms, Oxycodone, Naloxone, Dexmedetomidine

### 요약

옥시코돈/날록손 복합제는 암성 통증 관리에 널리 사용되고 있다. 본래 아편유사제 길항제인 날록손은 아편유사제와 동시에 사용할

수 없으나, 낮은 생체 이용률 때문에 경구용 복합 제제로 사용할 수 있다. 55세 남자 위암 환자에서 발생한 옥시코돈/날록손 복합제에 의해 유발된 중증 아편유사제 금단 증후군을 dexmedetomidine을 통해 성공적으로 치료한 증례를 소개한다. 환자는 모르핀 정맥주사를

This is an Open Access article distributed under the terms of the Creative Commons Attribution Non-Commercial License (<http://creativecommons.org/licenses/by-nc/4.0/>) which permits unrestricted non-commercial use, distribution, and reproduction in any medium, provided the original work is properly cited.

통해 압성 통증을 안정적으로 관리하고 있었다. 퇴원을 위해 정맥 모르핀을 경구용 옥시코돈/날록손 복합제로 전환하였다. 환자는 옥시코돈/날록손 복합제를 복용한 지 30분 후에 갑자기 불안, 속쓰림, 폭력적인 행동을 보였다. Midazolam과 propofol을 사용하여 진정 유도를 시도하였으나 역설적인 초조감과 산소포화도 저하가 발생하였다. 이후 dexmedetomidine을 적용하였고 환자는 심박수 감소와 초조감이 호전되는 경과를 보였다. 이후 dexmedetomidine의 용량을

증가시킴으로써 증상은 더욱 안정화되었다. 해당 증례를 통해 임상 의는 아편유사제를 옥시코돈/날록손 복합제로 전환할 때 아편유사제 금단 증후군이 발생할 수 있음을 알 수 있으며, 환자의 상태에 따라 적절한 진정제와 dexmedetomidine을 사용하여 치료할 수 있다.

**중심단어:** 아편유사제 금단현상, 옥시코돈, 날록손, 텍스메테토미딘
